# Supplementary material for: A near-infrared light responsive temperature-sensing switch in a submicro-channel heterogeneous membrane
Source: Royal Society of Chemistry journal article supplement (doi:10.1039/d3ta03032f), 2023-01-01
Supplement: d3ta03032f1.pdf [file d3ta03032f1.pdf]

## Electronic Supplementary Information

### **Near-infrared light responsive temperature-sensing switch in submicro-channel heterogeneous membrane**

*Yuan-Ju Tang,<sup>[a, b]</sup> Kai Cheng,<sup>[a]</sup> Pei-Jie Zhang,<sup>[a]</sup> Yan-Fei He,<sup>[a]</sup> Meng-Wen Ma,<sup>[a]</sup>  
Wen-Ming Su,<sup>[c]</sup> Guo-Ping Wang, <sup>\*[a, d]</sup> Jin-Xuan Fan, <sup>\*[a]</sup> Yuan-Di Zhao <sup>\*[a, d]</sup>*

[a] Britton Chance Center for Biomedical Photonics at Wuhan National Laboratory for Optoelectronics-Hubei Bioinformatics & Molecular Imaging Key Laboratory, Department of Biomedical Engineering, College of Life Science and Technology, Huazhong University of Science and Technology, Wuhan 430074, Hubei, P. R. China

[b] Department of Public Fundamental Courses, West Yunnan University of Applied Sciences, Dali 671000, Yunnan, P. R. China

[c] Printable Electronics Research Center, Suzhou Institute of Nano-Technology and Nano-Bionics, Chinese Academy of Sciences, Suzhou 215123, Jiangsu, P. R. China

[d] Key Laboratory of Biomedical Photonics (HUST), Ministry of Education, Huazhong University of Science and Technology, Wuhan 430074, Hubei, P. R. China

E-mail address: wangguoping@hust.edu.cn (G.-P. Wang); jxfan@hust.edu.cn (J.-X. Fan); zydi@mail.hust.edu.cn (Y.-D. Zhao).

## 1. The experimental materials and equipments

Cylindrical anodic aluminium oxide channel membrane (AAO, thickness: 60  $\mu\text{m}$ , aperture: 20~300 nm) was purchased from Hefei Puyuan Nanotechnology Co., Ltd. (Anhui, China). Potassium chloride, potassium hydroxide, concentrated hydrochloric acid (~36%), tetrahydrofuran, 1, 4-dioxane, ether, potassium dihydrogen phosphate, potassium hydrogen phosphate, etc. were purchased from Sinopharm Chemical Reagents Co., Ltd. (Shanghai, China). Dopamine hydrochloride (DA), tris(hydroxymethyl)aminomethane (Tris), N-isopropylacrylamide (NIPAM), 2-(dodecyl trithiocarbonate)-2-methylpropionic acid (DMP), 2, 2'-azodiisobutyronitrile (AIBN), tributylphosphine, *n*-hexamine, tri(2-carboxyethyl) phosphine (TCEP) were purchased from Shanghai Aladdin Biochemical Technology Co., Ltd. (Shanghai, China), 47-50% chlorauric acid ( $\text{HAuCl}_4$ ) was purchased from Shanghai No. 1 Reagent Factory (Shanghai, China). All chemicals were used directly without further purification.

The equipments used in the experiment included RepHile ultrapure water meter ( $\geq 18.2$   $\text{M}\Omega\cdot\text{cm}$ , China), LAQUAtwin-pH-22 pH meter (Horiba Scientific, Japan), SU8010 ultra-high resolution field emission scanning electron microscope (Hitachi, Japan), OCA20 video optical contact angle measurement (DatapPhysics, Germany), AXIS-ULTRA DLD-600 W X-ray photoelectron spectrometer (Shimadzu, Japan), UV-2550 UV-Visible spectrophotometer (Shimadzu, Japan), Zetasizer Nano ZS90 (Malvern Instruments, England), QE65000 optical fiber spectrometer (OceanOptics, USA), EPMA-8050G electron probe microanalyzer (Shimadzu, Japan), MDL-III-808-2.5W infrared laser (Changchun New Industries Optoelectronics Tech. Co., Ltd, China) and CHI 830D electrochemical workstation (CH Instrument Inc., China)

## 2. Synthesis of sulfhydryl-terminated poly-N-isopropylacrylamide (PNIPAM-SH)

NIPAM (3.47 g, 30.66 mmol), DMP (56 mg, 0.15 mmol) and AIBN (5 mg, 0.03 mmol) were placed in the two-neck round-bottom flask with argon gas for 30 min, 15 mL of 1, 4-dioxane was added to dissolve the reactants fully. After stirring in an oil bath of 60 °C for 3 h, the reaction was terminated quickly by cooling and exposing the flask to air. The crude product was diluted with tetrahydrofuran and purified with *n*-hexane for three times to get the precipitation, drying overnight in a vacuum oven of 40 °C. Light yellow powder solid, trithiocarbonate and carboxyl terminated poly-N-isopropylacrylamide (PNIPAM-CTA,  $M_n$ , GPC =2860 g/mol, PDI=1.73) was obtained.

Then, PNIPAM-CTA (2 g) was put into the two-neck round-bottom flask, and 15 mL of 1, 4-dioxane was added with argon gas for 30 min. 700  $\mu$ L of *n*-hexamine and 350  $\mu$ L of tributyl phosphine were added into the flask, and the reaction was finished after stirring at room temperature for 2 h. The crude product was purified with ice ether for three times to get the precipitation. After drying overnight in a vacuum oven of 40 °C, sulfhydryl and carboxyl terminated poly-N-isopropyl acrylamide (PNIPAM-SH,  $M_n$ , GPC=2704 g/mol, PDI=1.69) as white powder solid was obtained.

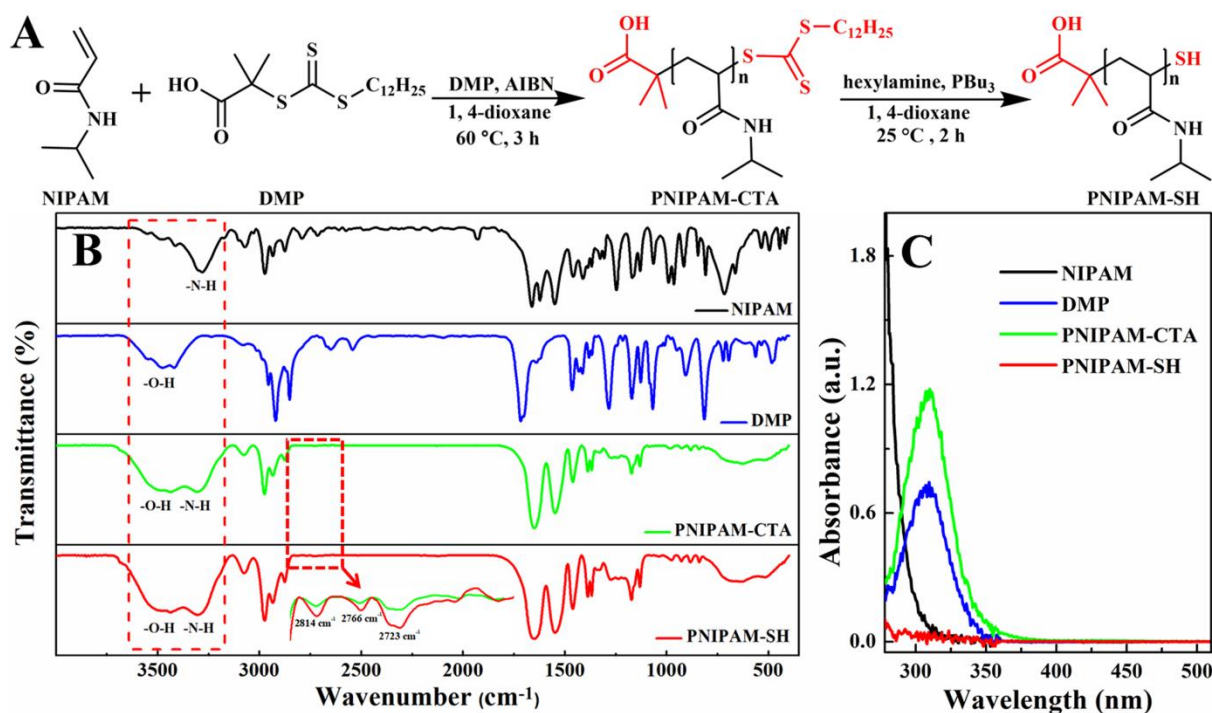

**Fig. S1** The synthesis schematic diagram (A), FTIR spectrum (B) and UV-visible absorption spectrum (C) of PNIPAM-SH.

### 3. Preparation of PDA-Au-S-PNIPAM nanoparticles

17 mL of dopamine hydrochloride solution (0.02 M) and 17 mL of Tris-HCl buffer solution (10 mM, pH 8.5) were mixed and stirred for 90 min, then 37.5 mL of HAuCl<sub>4</sub> (2.3 mM) solution was added and stirred for 1 h. After centrifuging at 10000 rpm for 15 min, precipitation was washed by deionized water twice. The TCEP activated PNIPAM-SH (18 mL, 5 mg/mL) solution was added to the precipitation and stirred overnight. After centrifuging at 10000 rpm for 15 min, the PDA-Au-S-PNIPAM nanoparticles were achieved and washed by deionized water twice, storing in the refrigerator at 4 °C for later use.

### 4. Characterization of zeta potential and particle size

The prepared PDA-Au-S-PNIPAM nanoparticles were dispersed into PBS buffer, the pH of mixed solution was adjusted by 0.1 M HCl and KOH. Then, the zeta potential and particle size were measured at pH 3 and pH 11 after filtration with 0.22 μm PES filter membrane.

**Table S1.** Size and zeta potential of PDA-Au-S-PNIPAM nanoparticles

| PDA-Au-S-PNIPAM | pH 11     |           | pH 3      |           |
|-----------------|-----------|-----------|-----------|-----------|
|                 | 25 °C     | 43 °C     | 25 °C     | 43 °C     |
| Size/nm         | 154.7±2.1 | 135.7±5.8 | 308.9±8.9 | 257.4±9.4 |
| Zeta/mV         | -16.1±1.4 | -28±2.0   | 79.0±3.0  | 6.1±2.2   |

## 5. Fluorescence and UV Characterization of heterogeneous membrane

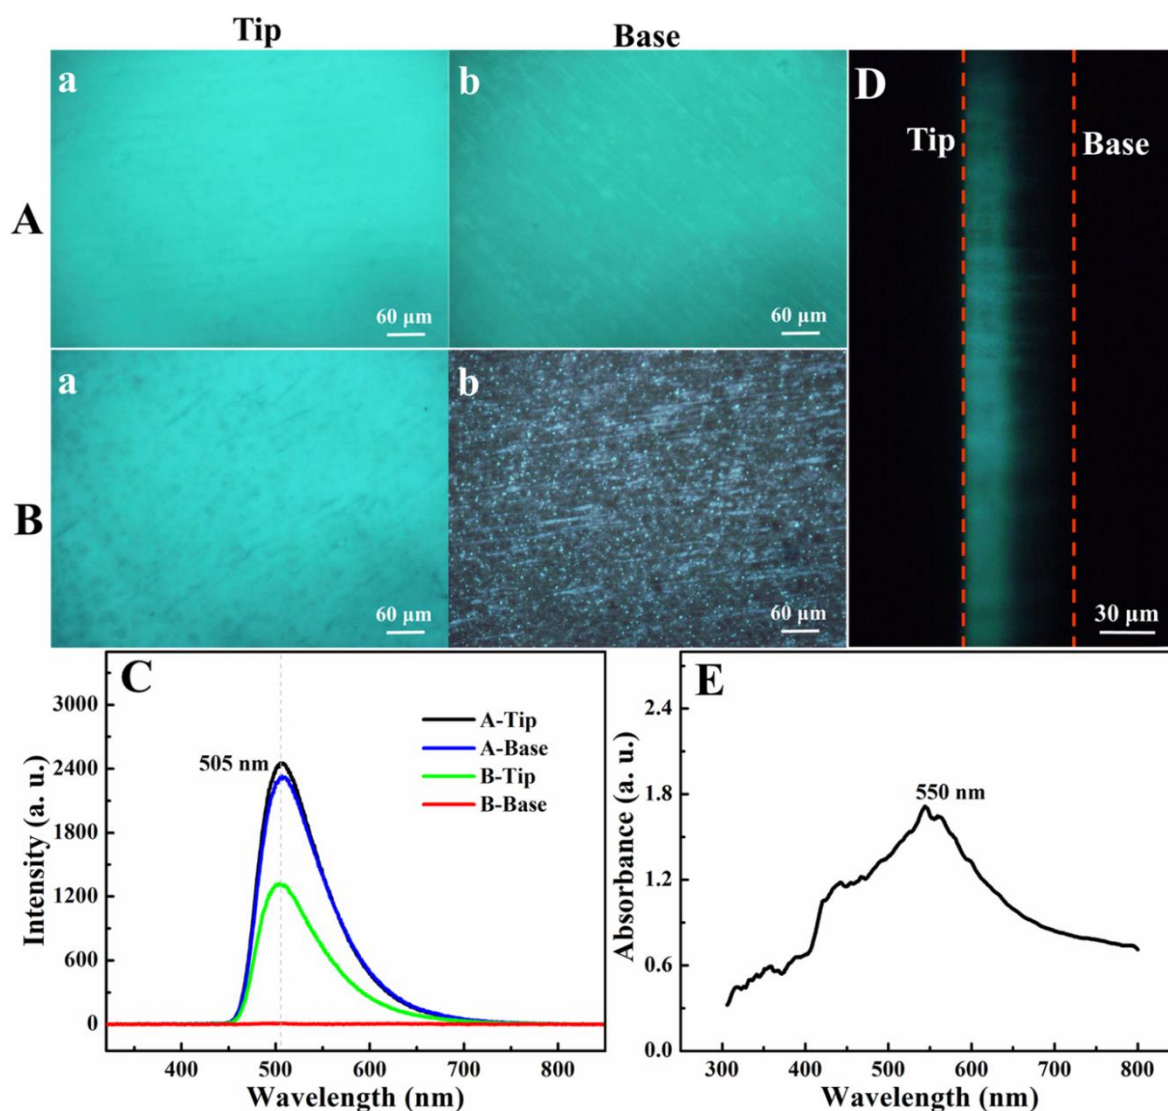

**Fig. S2** The fluorescence image of Tip (a) and Base (b) end for AAO/PPhCz (A) and AAO-3(PDA-Au)-S-PNIPAM/PPhCz (B) under inverted fluorescence microscope and corresponding fluorescence spectrum (C); the cross-sectional fluorescence image (D) and UV-Vis absorption spectrum (E) of AAO-3(PDA-Au)-S-PNIPAM/PPhCz.

## 6. Elemental analysis of heterogeneous membrane

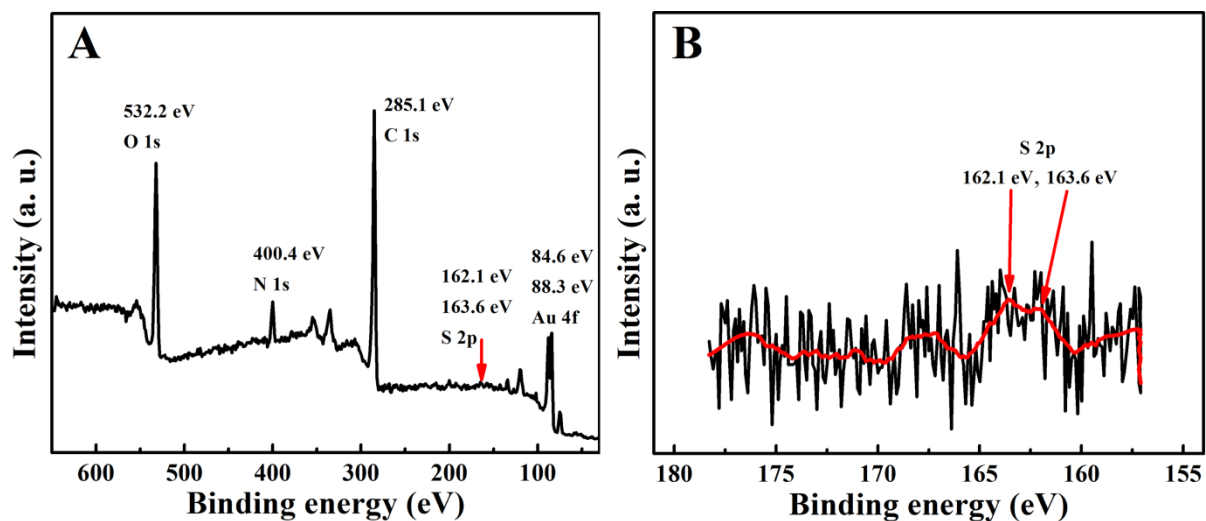

**Fig. S3** XPS spectrum of different elements at the Base end of AAO-3(PDA-Au)-S-PNIPAM/PPhCz (A) and the corresponding enlarged spectrum of S element (B).

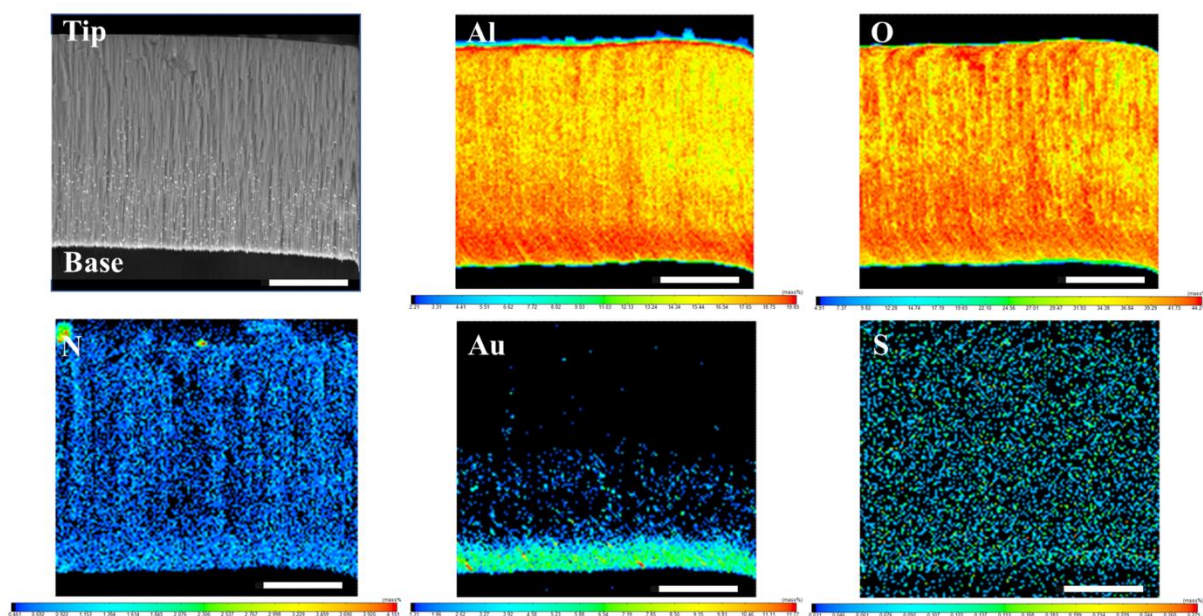

**Fig. S4** Distribution of different elements at the cross section of AAO-3(PDA-Au)-S-PNIPAM/PPhCz by electron probe microanalysis, bar: 20  $\mu\text{m}$ .

**Table S2.** The comparison with the previously reported photoresponsive nanochannel

| Devices                                                        | Photoresponsive materials                                                                    | Excitation wavelength (nm) | The maximum photoresponsive current | References |
|----------------------------------------------------------------|----------------------------------------------------------------------------------------------|----------------------------|-------------------------------------|------------|
| P-SPMA-modified conical glass nanochannel                      | Spiropyran derivative                                                                        | 365                        | < 50 nA                             | 1          |
| N3/PTE-BS patterned Al <sub>2</sub> O <sub>3</sub> nanochannel | Thiophene polyelectrolyte and bipyridine ruthenium                                           | 420 & 520                  | ~2.0 μA                             | 2          |
| AZO-MOF ion channels                                           | Azobenzene derivatives                                                                       | 365                        | ~0.4 nA                             | 3          |
| TPPS/Al <sub>2</sub> O <sub>3</sub>                            | Tetra(4-sulfonatophenyl)porphyrin nanofiber                                                  | 420                        | 9.7 μA                              | 4          |
| N3/Al <sub>2</sub> O <sub>3</sub>                              | Ruthenium complex cis-bis(isothiocyanato)bis(2,2'-bipyridyl-4,4'-dicarboxylato)ruthenium(II) | 380 & 518                  | 561.46 nA                           | 5          |
| AAO-3(PDA-Au)-S-PNIPAM/PPhCz                                   | Polydopamine and Au nanoparticles                                                            | 808                        | 183.7 μA                            | This work  |

## References

1. Y. Y. Wu, L. D. Chen, X. H. Cai, Y. Zhao, M. Chen, X. H. Pan and Y. Q. Li, *ACS Appl. Mater. Interfaces*, 2021, **13**, 25241-25249.
2. Y. Ren, Y. Liu, L. Zhang, X. Fan, J. Zhai and L. Jiang, *Adv. Energy Mater.*, 2021, **11**, 2003340.
3. T. Qian, C. Zhao, R. Wang, X. Chen, J. Hou, H. Wang and H. Zhang, *Nanoscale*, 2021, **13**, 17396-17403.
4. D. Zhang, S. Zhou, Y. Liu, X. Fan, M. Zhang, J. Zhai and L. Jiang, *ACS Nano*, 2018, **12**, 11169-11177.
5. Y. Liu, Y. Kong, X. Fan, J. Zhai and L. Jiang, *J. Mater. Chem. A*, 2017, **5**, 19220-19226.
